# Supplementary material for: On the lidar-turbulence paradox and possible countermeasures
Source: Copernicus journal article supplement (doi:10.5194/wes-2024-108), 2024-09-09
Supplement: Supplementary file [file wes-2024-108-AC1-supplement.pdf]

## Response to the comments from referee 1

Thanks for your very positive comments on our manuscript. Here our response to each of your comments. The response is given in [blue color](#).

Best regards,  
The authors

---

This article addresses LiDAR-turbulence paradox, i.e. the underestimation of the LiDAR-based turbulence intensity due to the probe volume averaging. Based on the data collected during a months-long campaign by two continuous-wave profiling LiDARs and four sonic anemometers, the authors adopt a neural network (NN) algorithm to correct the LiDAR's along-velocity variance. The problem is addressed at three different levels: first, utilizing a physics-based turbulence model to efficiently reproduce the LiDAR-to-sonic turbulence ratio; second, the physics-based model is used to train a physics-based NN (PBNN) on LiDAR turbulence data to correct the probe-volume averaging effect and positively assess them against the sonic anemometry; finally, the data from one LiDAR are used to train a data-driven NN (DDNN) to correct the turbulence prediction from a second co-located LiDAR and compare the latter against sonic anemometry. The article is well written, the results are encouraging, and the limitations of the current analysis are thoroughly discussed. Thus, I recommend this article for publication after few major revisions I have detailed in the remainder of this review.

### General comments

- Eq. 1: If you assume a right-handed reference frame (i.e. with the  $z$ -axis pointing upward), the radial wind speed is:  $v_r = u \cos \phi + w \sin \phi$ . Please cross check this equation.

The Equation in line 47 of the original submission is correct for an upwind lidar beam (as the one we show in the figure). The equation mentioned by the reviewer is correct for the downwind case or for the case with 'negative'  $\phi$  angles as we mentioned in the original submission in lines 54–55. To clarify better this, we now add "i.e., pointing upwind," just before the above equation is mentioned and add "or when the lidar points downwind" after "For the cases with negative  $\phi$  values" later in the paragraph.

- Eq. 3 (Line 115): Should the argument of the complex exponential have a negative sign?

Yes, it is now corrected as suggested. Thanks for noticing.

- Line 124: I would explicitly write the Mann's model of the spectral tensor.

We do not think that writing fully the elements of the Mann tensor will aid to the manuscript. It is explicitly written in Mann [1994], which we refer to in the same lines.

- Lines 133-134: Which values of  $L$  and dissipation rate did you use?

As suggested, we added the values of  $L$  used for the computations. The ratio of the variances is independent on the dissipation parameter value for the Mann model. This is also now stated along the same lines.

- Line 164: To improve the overall clarity of the manuscript, I suggest moving the "Methods" section after the site description section, since the content of Section 4 is mentioned several times in Section 3.

As suggested, we moved the Methods section after the Data filtering and analysis section.

- Line 197: Please provide a reference for the estimation of the dissipation rate.

As suggested, we now add the text '... which is based on the form  $\epsilon \kappa z / u_*^3 = 1$  from similarity theory [Stull, 1988]' along those lines

- Line 261: I believe a schematic of the experiment (or pictures) is useful to the reader to better understand the remainder of this study.

These are ground-based commercial profiling lidars besides a tall meteorological mast; for this particular ‘standard’ scanning mode and standard procedure of evaluation, we do not think that a figure will aid to the manuscript.

- Line 265: A maximum time lag of 10 s is acceptable when second-order statistics are cross-validated among different instruments. However, I would not mention “time synchronization” for this study as, to my understanding, the different instruments were not sampling based on a common GPS time stamp.

As mentioned by the reviewer, there is not a lidar/mast common GPS time so we have deleted the time synchronization part.

- Line 306: The agreement between mean velocity measured by sonic and Lidar looks excellent. Please add the slope, intercept and coefficient of determination to quantify the agreement.

It looks excellent because we only use data where the difference between lidar and sonic mean wind speed is less than  $1 \text{ m s}^{-1}$  as we stated in lines 290–291 of the original submission. We show the comparison/data for completeness only and find that it will be unfair to evaluate the agreement when we have on purpose biased the comparison.

- Lines 308-312: In Fig. 4, the information may be better stated quantifying the linear regression parameters between lidar- and sonic-based variance. You can just provide one global value for each height (regardless of the stability and length scale), or specific values for each data subset. I leave this up to the authors’ decision, but I believe that the initial comparison between sonic and lidar variance estimates requires a thorough quantification.

We understand the comment of the reviewer but we believe such quantification does not provide insights about the lidar-turbulence problem itself. For this type of scanning and lidar, sonic-lidar velocity variance comparisons, contrary to mean speed comparisons, should be biased and should have scatter; values that quantify the bias and scatter are function of the amount of contamination and filtering, which is dependent of the turbulence characteristics (the latter dependent on the length scale and anisotropy on the view of the Mann model). Low correlations in these comparisons could simply mean that the range of turbulence conditions explored is broad, and not particularly that the lidar is not measuring as it should.

- Line 347: Previously (Line 320) you mentioned that a common value of  $\Gamma = 3$  is used across all stability and length scale cases. Considering that the thermal stability influences the isotropy/anisotropy of the energy-carrying turbulent structures, would you observe any difference in Fig. 7 letting  $\Gamma = 2$  or  $\Gamma = 4$ ?

Yes, as already hinted when presenting Fig. 2, there is a dependency on  $\Gamma$ , not only in Fig. 7 but on Figs. 6 and 8 of the original submission. We only use a fixed  $\Gamma$  value for these three plots to show how the velocity variance ratios change with height and length scale. However, we vary  $\Gamma$  when creating the datasets based on the physics-based model for the NNs.

- Lines 388-389: Do you have an explanation of why the case with the lowest number of inputs (P4) returns the best agreement? During the cross-validation of the PBNN the result was opposite (case P8 in Table 1).

This is because during the cross-validation (Sect. 3.1.1 of the original submission), we only use model-based datasets; however for the full evaluation we use lidar observations to estimate the parameters that the physics-based model needs or outputs.

- Lines 394-398: In Fig. 12 (and following) I would rather just plot the error bars of the along-velocity variance against the wind speed, instead of the TI (which is not independent from the mean wind speed). The error on the TI inevitably carries the error on the mean velocity (tough small), whereas here you want to highlight only the error on the second-order turbulence statistic.

We agree with the reviewer that the parameter of study should be the along-velocity variance and not the TI. However, TI is the standard turbulence measure of the community (for good or wrong reasons) and we believe the results have much more impact showing this metric (also TI vs  $U$  is a metric for turbine site selection). Since we make sure that the lidar exhibits an excellent agreement with the sonic data for the mean wind speed, the TI deviations are, in our particular case, driven by the variance deviations mostly.

- Line 406: I agree that having a large number of samples within the 5.25–5.50 m/s bin improves the agreement with the sonic-based values. However, I see that you have a good agreement also for the highest bins, where

the number of occurrences is much smaller. Thus, I don't think that the occurrences are the only reason why the agreement is poorer at low wind speed. My suggestion is to separate the along-velocity variance from the wind speed and see how the results change (see my previous comment).

The reviewer is right that this is not the only reason. In the mentioned lines, we only state the observation: high deviations occur within this range of wind speeds, which show low number of samples; later in the Discussion section, we provide some insights to other issues/challenges that might impact the results on the lidar TI predictions.

### Technical comments

- Table 3: The header of the last column should report  $z/L \leq -0.05$ .

Changed as suggested.

- Figure 9: I do not understand the unit on the ordinate axis. The figure's caption states that the histogram is normalized, but the sum of all the bar values is clearly greater than 1 (or 100%). Also, please change the upper limit of the  $y$ -axis to show the exact values of the left-most bar.

We now add that a.u. refers to arbitrary units in the caption. We limited the  $y$ -axis to 0.6 to clearly show the difference in the modeled and observed variance histogram, as the frequency of the first bin is nearly double that of the second bin, and to ease the comparison between the two heights. We also add in the caption that normalization is performed on each bin by dividing the number of elements in the bin by the product of the total number of inputs and the bin width. In this way one can compare the relative frequency of each bin from two datasets with different samples.

- Line 374: I found this sub-subsection a little bit dispersive in terms of results visualization. If the authors think it is possible, I suggest concentrating the top panels of Fig. 12, 14, 16 and 18 in a single figure, the bottom panels of these figures in another one and do the same for Figs. 11, 13, 15 and 17. The current back-and-forth between the text and the figures makes this portion of the manuscript a little bit hard to follow.

We understand the comment of the reviewer. The final layout of the WES papers is in a two-column format so the papers in review do not reflect the final layout. If accepted, we will try to make sure (as much as possible by commenting to the technical editors during the proof-reading stage) that figures can be found after the text describing them within the same page.

- Line 410: Please replace "that of two" with "the ones of the two [...]".

As suggested, we replace the text but we use "the one of the two" instead.

- Line 471: Please correct the equation:  $U \leq 5 \text{ m s}^{-1}$ .

Corrected as suggested.

- Line 526: Before summarizing the results of this study, it is useful to start the Conclusion with a summary of the experimental setup and data analysis methods used in this work.

As suggested, we now add a summary of the work and the ideas before presenting the results

## References

J. Mann. The spatial structure of neutral atmospheric surface-layer turbulence. *J. Fluid Mech.*, 273:141–168, 1994.

R. B. Stull. *An introduction to boundary layer Meteorology*. Kluwer Academic Publishers, 1988.
